# Supplementary material for: Perinatal outcomes among births to women with infection during pregnancy
Source: PubMed Central journal article supplement — Arch Dis Child. 2021 Sep 2;106(10):946–53. doi: 10.1136/archdischild-2021-321865 (PMC8461398; doi:10.1136/archdischild-2021-321865), 2021-09-02
Supplement: archdischild-2021-321865supp001.pdf [file archdischild-2021-321865supp001.pdf]

**Appendix 1: Characteristics of the hospitals**

| <b>Variable</b>                       | <b>n</b> | <b>%</b> |
|---------------------------------------|----------|----------|
| <b>Facility ownership</b>             |          |          |
| Public                                | 316      | 77.5     |
| Private/NGOs/faith-based organisation | 92       | 22.5     |
| <b>Location</b>                       |          |          |
| Urban                                 | 317      | 77.7     |
| Peri-urban                            | 51       | 12.5     |
| Rural                                 | 40       | 9.8      |
| <b>Level of care</b>                  |          |          |
| Primary                               | 70       | 17.2     |
| Secondary                             | 180      | 44.1     |
| Tertiary                              | 158      | 38.7     |
| Total                                 | 408      | 100.0    |
