# Supplementary material for: Perinatal outcomes among births to women with infection during pregnancy
Source: PubMed Central journal article supplement — Arch Dis Child. 2021 Sep 2;106(10):946–53. doi: 10.1136/archdischild-2021-321865 (PMC8461398; doi:10.1136/archdischild-2021-321865), 2021-09-02
Supplement: archdischild-2021-321865supp002.pdf [file archdischild-2021-321865supp002.pdf]

**Appendix 2: List of the 43 countries (in alphabetical order) and number of hospitals included in the study**

| <b>Country</b> | <b>Number of hospitals</b> | <b>Country</b> | <b>Number of hospitals</b> |
|----------------|----------------------------|----------------|----------------------------|
| Afghanistan    | 5                          | Mexico         | 7                          |
| Argentina      | 25                         | Mongolia       | 6                          |
| Benin          | 13                         | Morocco        | 21                         |
| Bolivia        | 6                          | Mozambique     | 4                          |
| Brazil         | 10                         | Myanmar        | 4                          |
| Burkina Faso   | 12                         | Nepal          | 5                          |
| Cambodia       | 6                          | Nicaragua      | 9                          |
| Cameroon       | 12                         | Nigeria        | 20                         |
| Colombia       | 14                         | Pakistan       | 3                          |
| Ecuador        | 5                          | Peru           | 4                          |
| Egypt          | 5                          | Philippines    | 9                          |
| Ethiopia       | 10                         | Moldova        | 7                          |
| Ghana          | 5                          | Romania        | 23                         |
| Guatemala      | 3                          | Senegal        | 12                         |
| Honduras       | 5                          | South Africa   | 6                          |
| India          | 8                          | Sri Lanka      | 4                          |
| Kazakhstan     | 15                         | Sudan          | 8                          |
| Kenya          | 11                         | Tajikistan     | 8                          |
| Kyrgyzstan     | 4                          | Thailand       | 14                         |
| Lebanon        | 4                          | Vietnam        | 35                         |
| Malawi         | 5                          | Zimbabwe       | 9                          |
| Mali           | 7                          | Total          | 408                        |
