# Supplementary material for: Perinatal outcomes among births to women with infection during pregnancy
Source: PubMed Central journal article supplement — Arch Dis Child. 2021 Sep 2;106(10):946–53. doi: 10.1136/archdischild-2021-321865 (PMC8461398; doi:10.1136/archdischild-2021-321865), 2021-09-02
Supplement: archdischild-2021-321865supp003.pdf [file archdischild-2021-321865supp003.pdf]

**Appendix 3: Distribution of neonatal near-miss cases by pragmatic and management criteria shown in Box 1**

| <b>Criteria</b>                                  | <b>Number of neonatal near-miss cases (n)</b> | <b>Percentage</b> |
|--------------------------------------------------|-----------------------------------------------|-------------------|
| <b>Neonatal near-miss</b>                        | <b>316</b>                                    | <b>100.0</b>      |
| <b>Pragmatic criteria (any)</b>                  | <b>135</b>                                    | <b>42.7</b>       |
| Birthweight < 1750 grams                         | 83                                            | 26.3              |
| Gestational age between 28 and 33 weeks          | 94                                            | 29.7              |
| 5-minute APGAR<7                                 | 46                                            | 14.6              |
| <b>Management criteria (any)</b>                 | <b>261</b>                                    | <b>82.6</b>       |
| Use of parenteral antibiotic                     | 193                                           | 61.1              |
| Ventilation                                      | 34                                            | 10.8              |
| Intubation at birth                              | 37                                            | 11.7              |
| Phototherapy within 24h                          | 64                                            | 20.3              |
| Cardiopulmonary resuscitation                    | 38                                            | 12.0              |
| Vasoactive drug                                  | 15                                            | 4.7               |
| Administration of anticonvulsant                 | 15                                            | 4.7               |
| Administration of surfactant                     | 24                                            | 7.6               |
| Administration of blood products                 | 13                                            | 4.1               |
| Use of steroid to treat refractory hypoglycaemia | 10                                            | 3.2               |
| Any surgery                                      | 6                                             | 1.9               |
