# Supplementary material for: Perinatal outcomes among births to women with infection during pregnancy
Source: PubMed Central journal article supplement — Arch Dis Child. 2021 Sep 2;106(10):946–53. doi: 10.1136/archdischild-2021-321865 (PMC8461398; doi:10.1136/archdischild-2021-321865), 2021-09-02
Supplement: archdischild-2021-321865supp006.pdf [file archdischild-2021-321865supp006.pdf]

**Appendix 6: Perinatal outcomes of births from women with infection during pregnancy by country and hospital characteristics, unadjusted analysis**

| Variable                               | Alive without severe complication (n=780)<br>n(%) | Neonatal near-miss (n=316) |          |           |                    | Perinatal death (n=123) |          |            |                    |
|----------------------------------------|---------------------------------------------------|----------------------------|----------|-----------|--------------------|-------------------------|----------|------------|--------------------|
|                                        |                                                   | n(%)                       | Crude OR | 95%CI     | p-value            | n(%)                    | Crude OR | 95%CI      | p-value            |
| <b>WHO region</b>                      |                                                   |                            |          |           |                    |                         |          |            |                    |
| Africa                                 | 164(54.6)                                         | 85(28.4)                   | 1.4      | [0.5-3.6] | 0.499              | 50(16.7)                | 4.0      | [1.5-10.6] | 0.005 <sup>†</sup> |
| Asia                                   | 110(71.4)                                         | 32(20.8)                   | 0.8      | [0.3-2.3] | 0.655              | 12(7.8)                 | 1.4      | [0.5-4.2]  | 0.519              |
| Eastern Mediterranean                  | 118(62.1)                                         | 41(21.6)                   | 0.9      | [0.3-3.0] | 0.903              | 31(16.3)                | 3.4      | [1.2-9.6]  | 0.019 <sup>†</sup> |
| Europe                                 | 131(68.9)                                         | 49(25.8)                   | ref      |           |                    | 10(5.3)                 | ref      |            |                    |
| The Americas                           | 257(66.6)                                         | 109(28.2)                  | 1.1      | [0.4-3.1] | 0.807              | 20(5.2)                 | 1.0      | [0.3-3.6]  | 0.976              |
| <b>Country income level</b>            |                                                   |                            |          |           |                    |                         |          |            |                    |
| Low-income                             | 153(62.5)                                         | 52(21.2)                   | 1.0      | [0.5-2.0] | 0.955              | 40(16.3)                | 5.6      | [2.1-14.8] | 0.001 <sup>†</sup> |
| Lower middle-income                    | 351(59.2)                                         | 172(29.0)                  | 1.5      | [0.8-2.6] | 0.180              | 70(11.8)                | 4.2      | [1.8-10.1] | 0.001 <sup>†</sup> |
| Upper middle-income                    | 276(72.4)                                         | 92(24.2)                   | ref      |           |                    | 13(3.4)                 | ref      |            |                    |
| <b>Facility level</b>                  |                                                   |                            |          |           |                    |                         |          |            |                    |
| Primary                                | 71(64.0)                                          | 29(26.1)                   | 1.0      | [0.5-1.7] | 0.873              | 11(10.0)                | 0.9      | [0.5-1.6]  | 0.661              |
| Secondary                              | 234(67.4)                                         | 85(24.5)                   | 0.9      | [0.5-1.5] | 0.587              | 28(8.1)                 | 0.7      | [0.3-1.5]  | 0.350              |
| Tertiary                               | 473(62.3)                                         | 202(26.6)                  | ref      |           |                    | 84(11.1)                | ref      |            |                    |
| <b>Type of facility administration</b> |                                                   |                            |          |           |                    |                         |          |            |                    |
| Public                                 | 729(64.2)                                         | 290(25.5)                  | ref      |           |                    | 117(10.3)               | ref      |            |                    |
| Private                                | 51(61.5)                                          | 26(31.3)                   | 1.3      | [0.7-2.2] | 0.399              | 6(7.2)                  | 0.7      | [0.3-2.0]  | 0.550              |
| <b>Number of births in 2016</b>        |                                                   |                            |          |           |                    |                         |          |            |                    |
| <1000                                  | 164(64.3)                                         | 75(29.4)                   | 0.5      | [0.3-0.9] | 0.019 <sup>†</sup> | 16(6.3)                 | 0.7      | [0.2-2.2]  | 0.554              |
| 1000-2499                              | 206(67.8)                                         | 71(23.4)                   | 1.1      | [0.7-1.8] | 0.683              | 27(8.9)                 | 0.6      | [0.3-1.2]  | 0.149              |
| 2500-4499                              | 237(61.9)                                         | 111(29.0)                  | 0.9      | [0.5-1.8] | 0.789              | 35(9.1)                 | 0.5      | [0.2-1.0]  | 0.047 <sup>†</sup> |
| >4500                                  | 172(62.3)                                         | 172(62.3)                  | ref      |           |                    |                         | ref      |            |                    |

<sup>†</sup>Statistically significant (p<0.05)
