# Supplementary figures and images for: Perinatal outcomes among births to women with infection during pregnancy
Source: PubMed Central journal article supplement — Arch Dis Child. 2021 Sep 2;106(10):946–53. doi: 10.1136/archdischild-2021-321865 (PMC8461398; doi:10.1136/archdischild-2021-321865), 2021-09-02

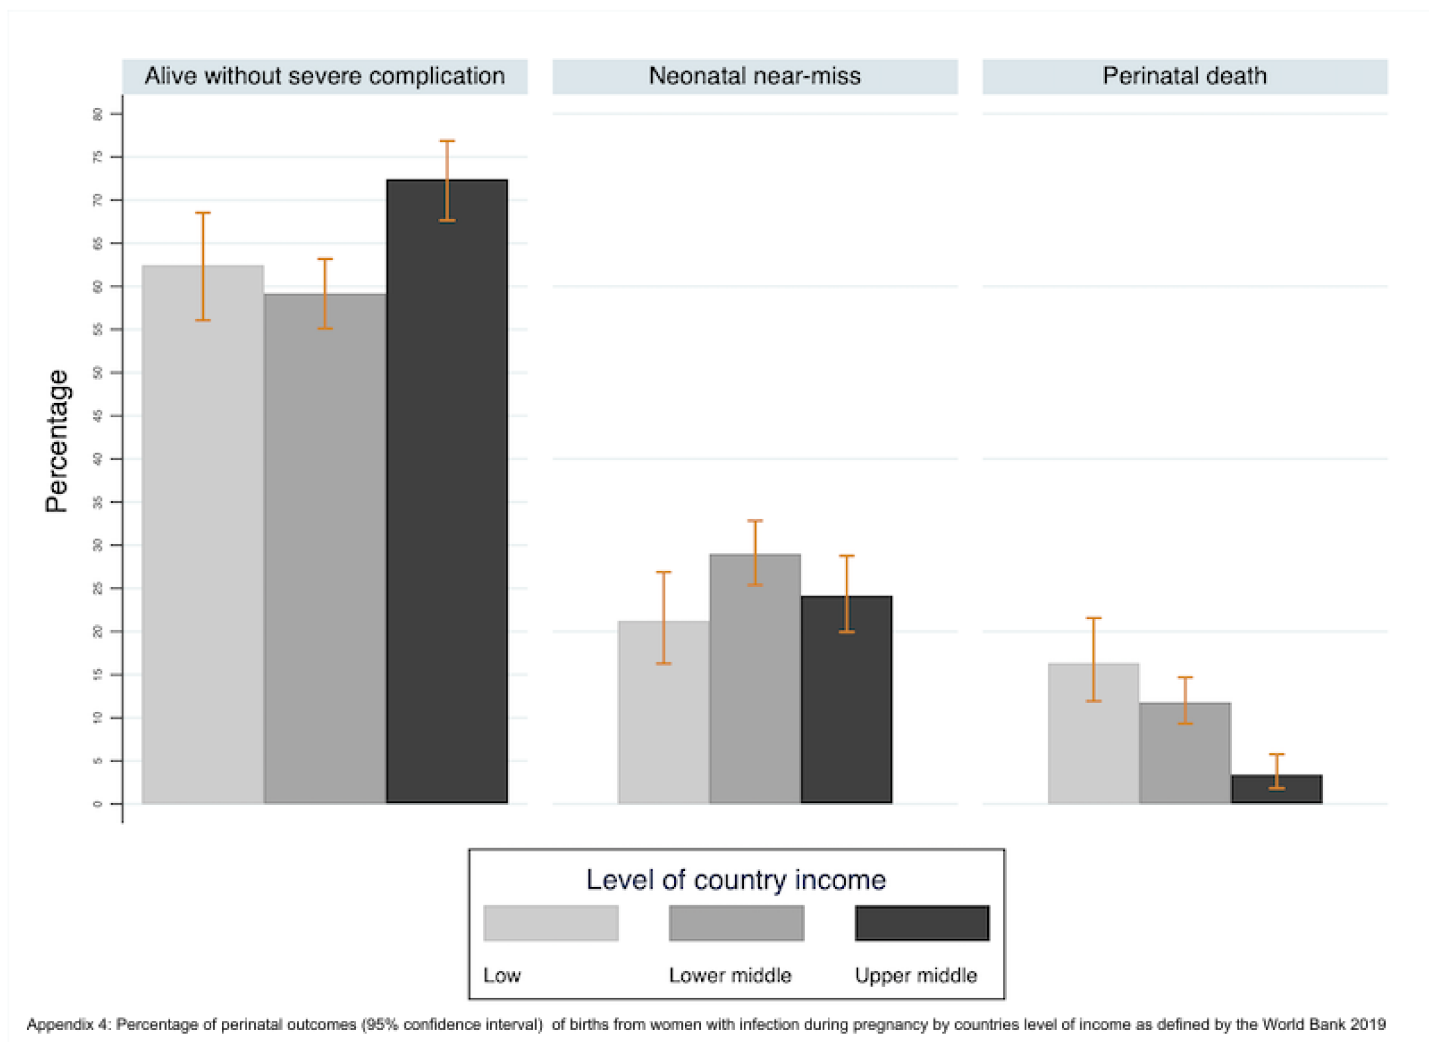

Supplement: archdischild-2021-321865supp004.pdf [file archdischild-2021-321865supp004.pdf]

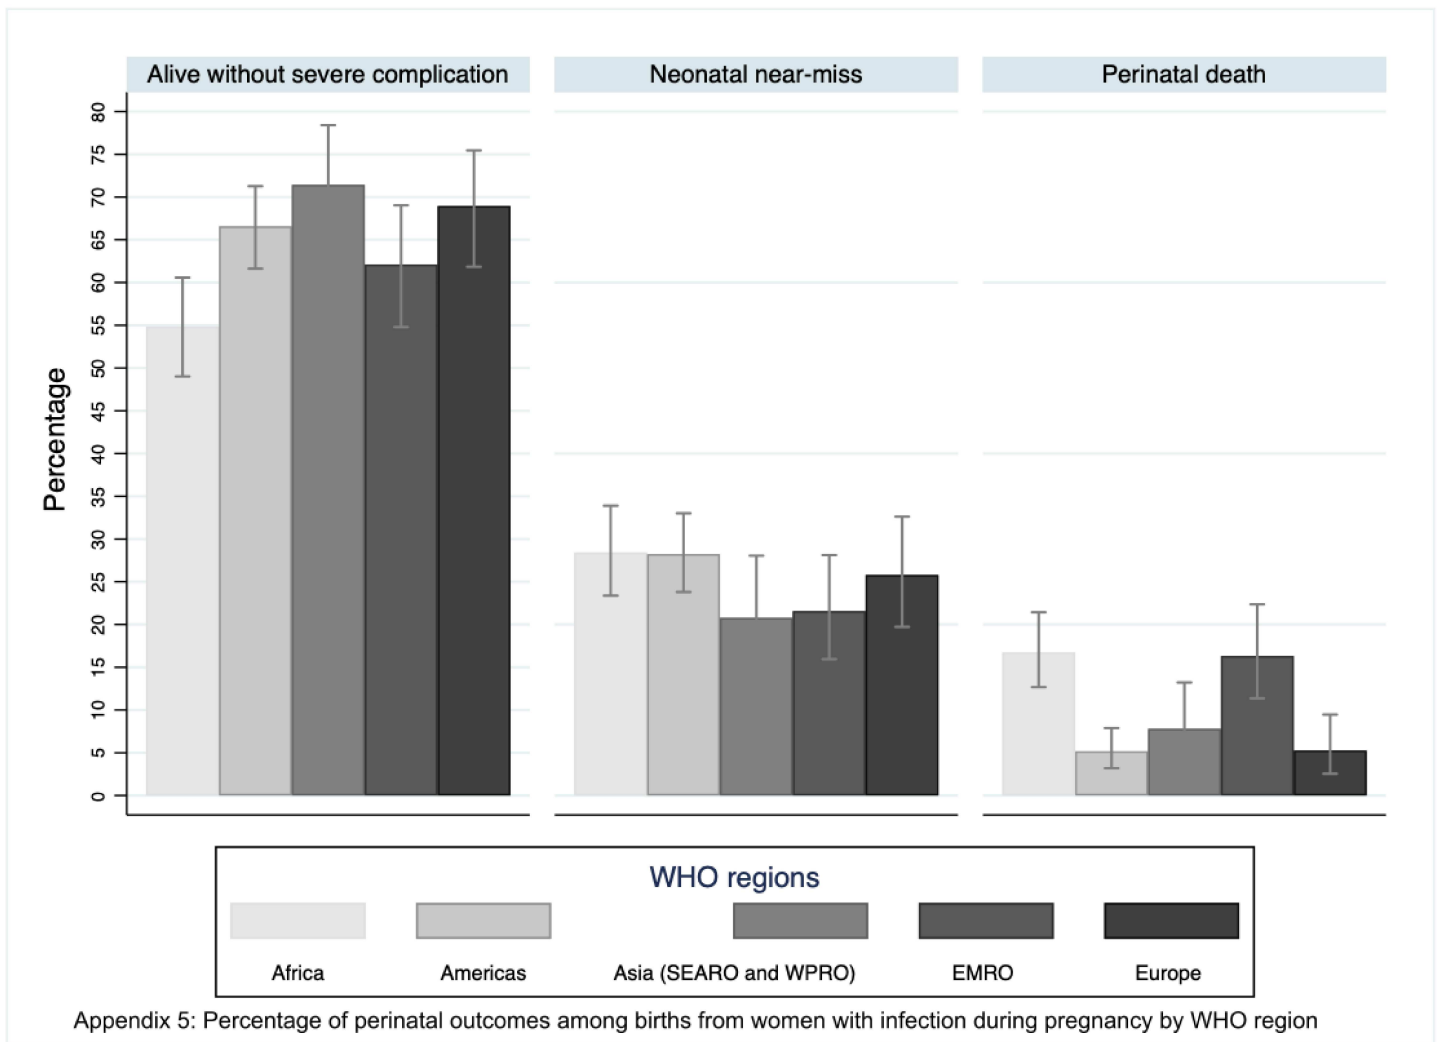

Supplement: archdischild-2021-321865supp005.pdf [file archdischild-2021-321865supp005.pdf]
